# Supplementary figures and images for: Diversity and biology of Spirometra tapeworms (Cestoda: Diphyllobothriidea), zoonotic parasites of wildlife: A review
Source: PubMed Central journal article supplement — Int J Parasitol Parasites Wildl. 2024 May 23;24:100947. doi: 10.1016/j.ijppaw.2024.100947 (PMC11261046; doi:10.1016/j.ijppaw.2024.100947), 2024-05-23

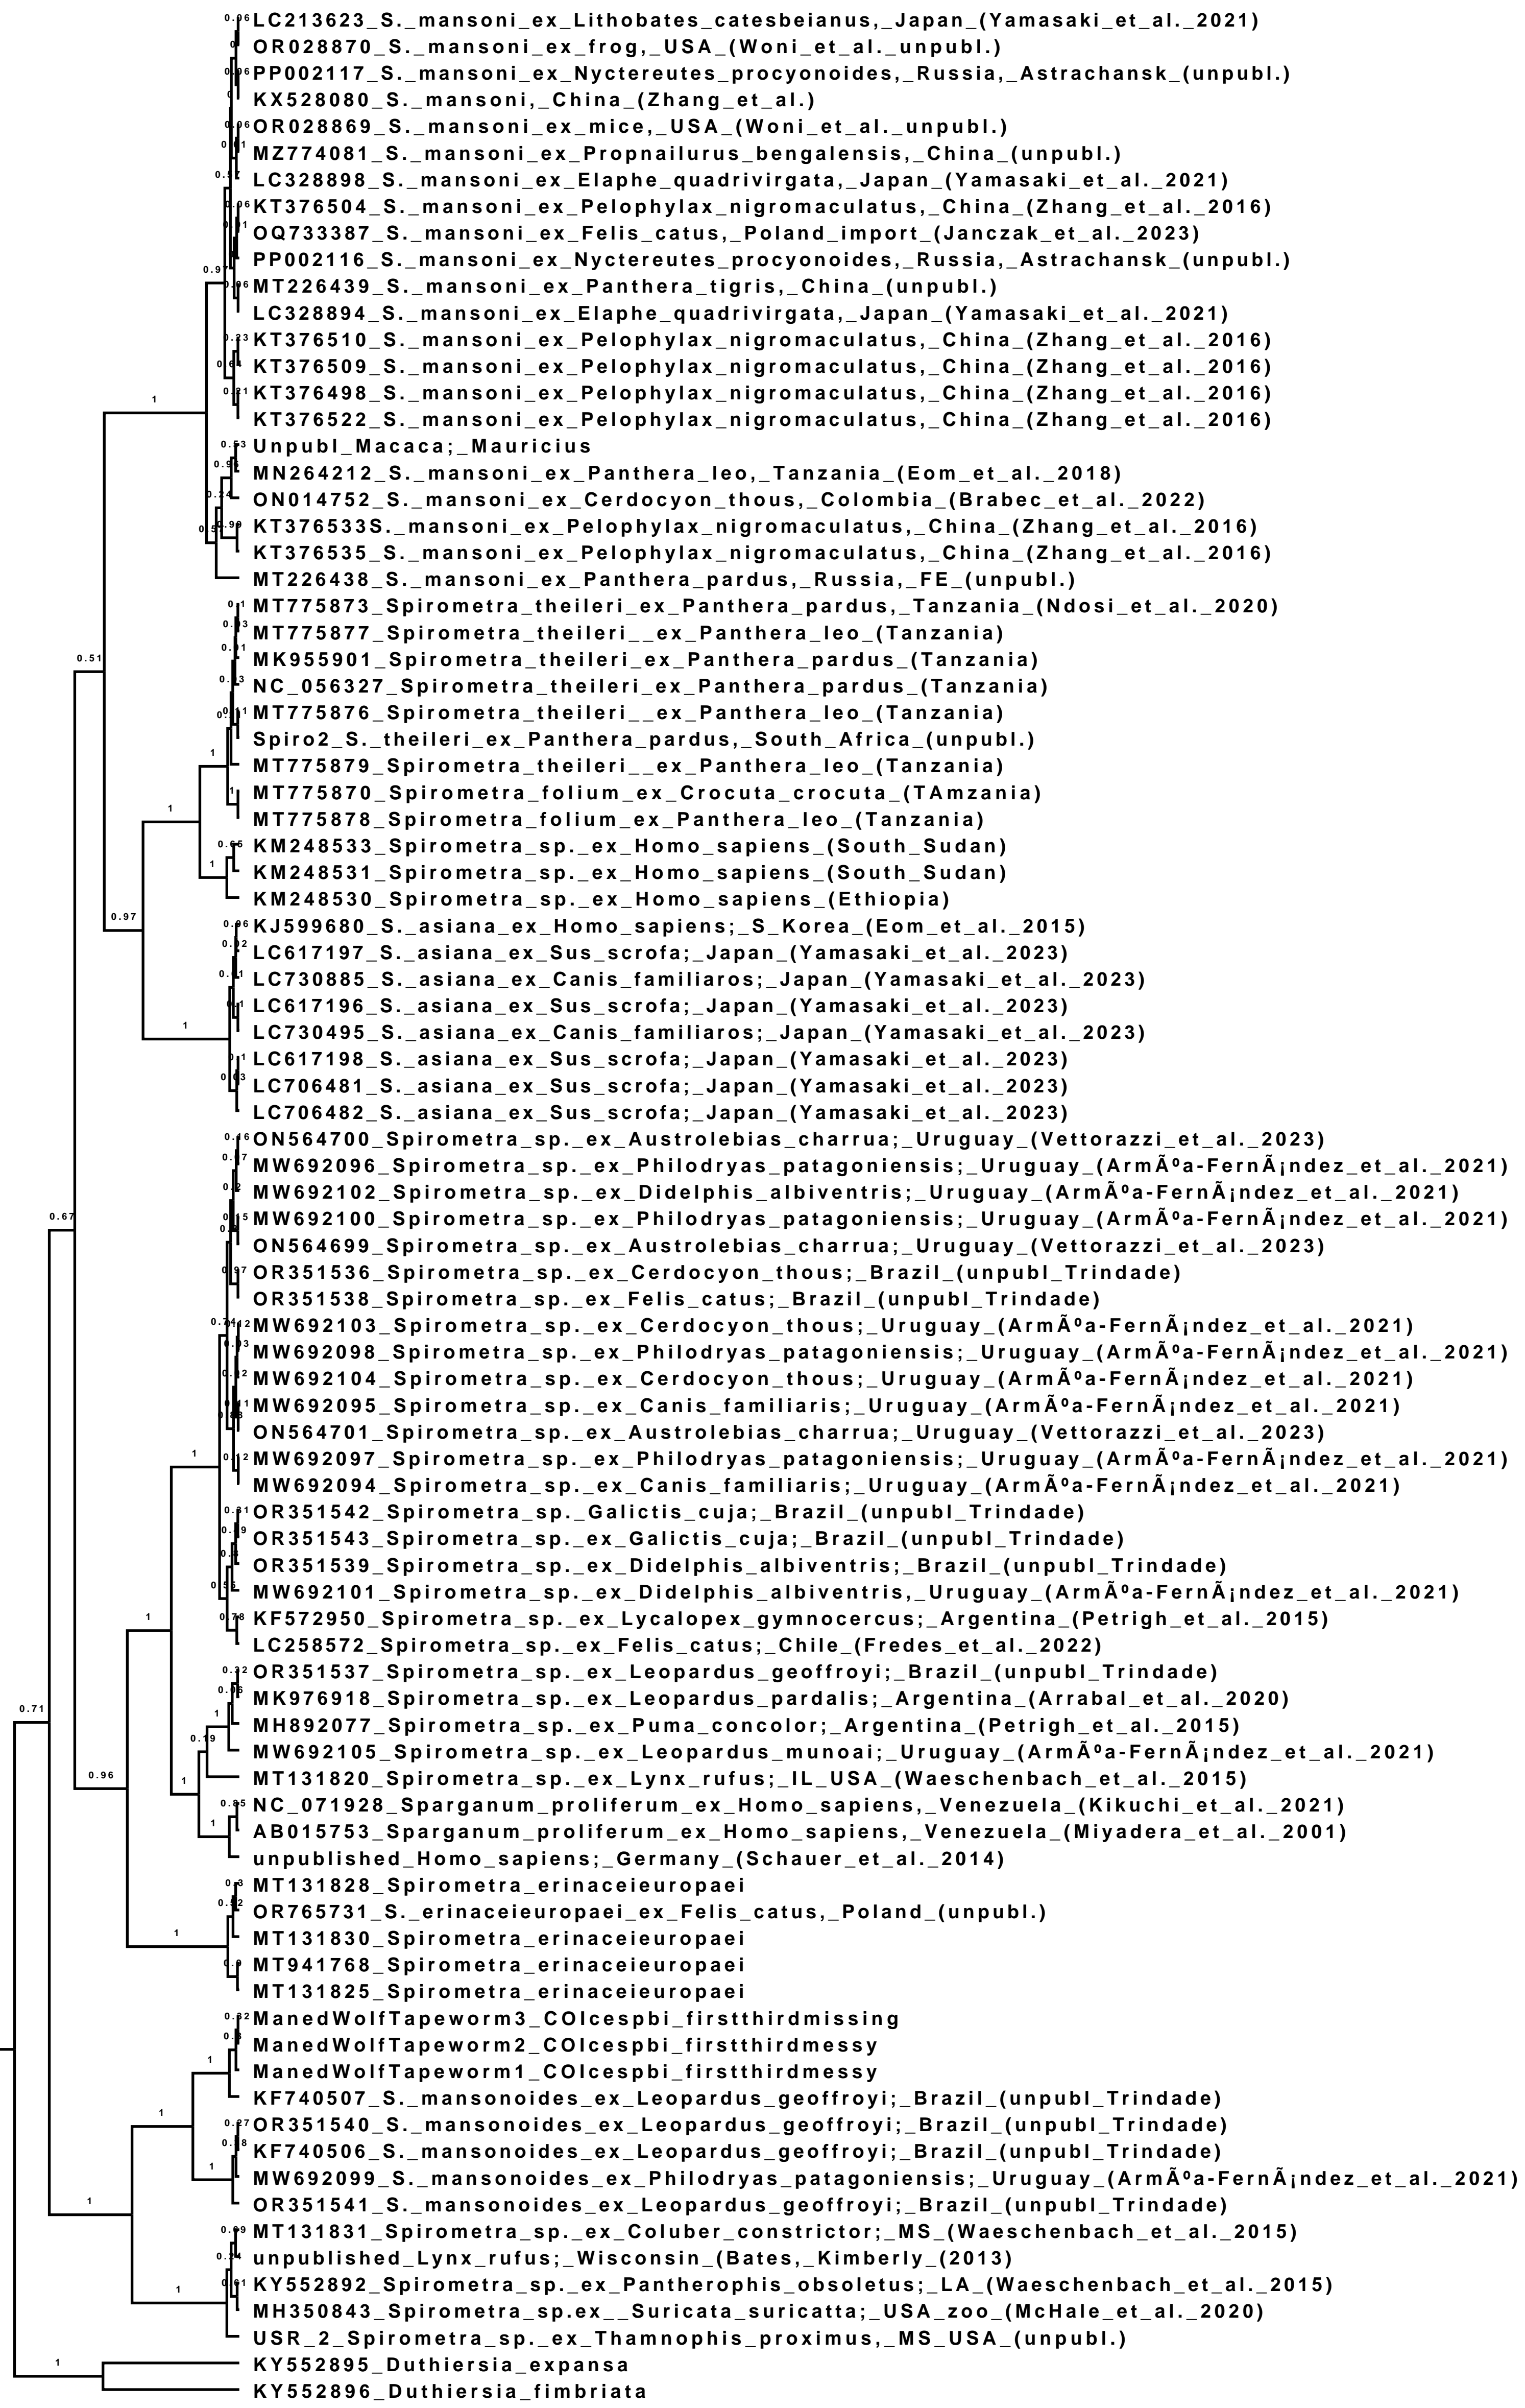

Supplement: mmc2.pdf [file mmc2.pdf]
